# Supplementary material
Source: publisher figshare collection journal article supplement (https://gsapubs.figshare.com/ndownloader/files/22399113)
Supplement: Supplementary file 1 [file 22399113]

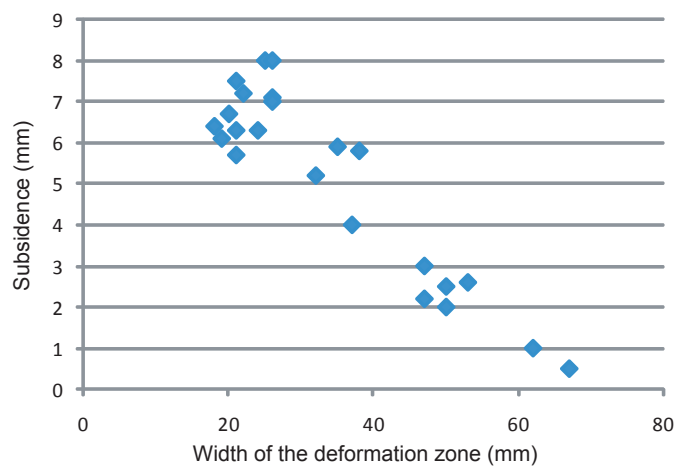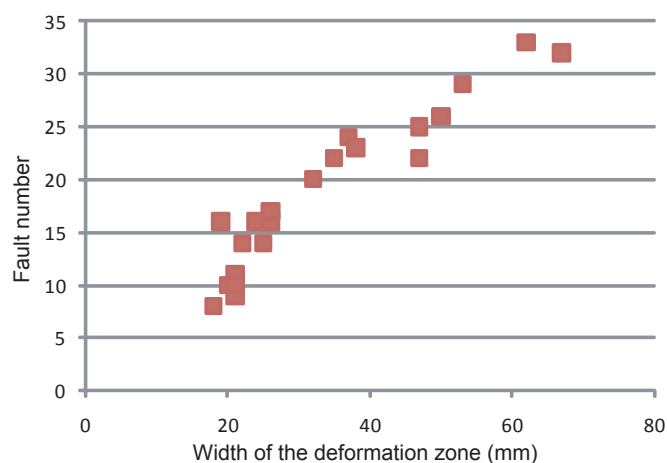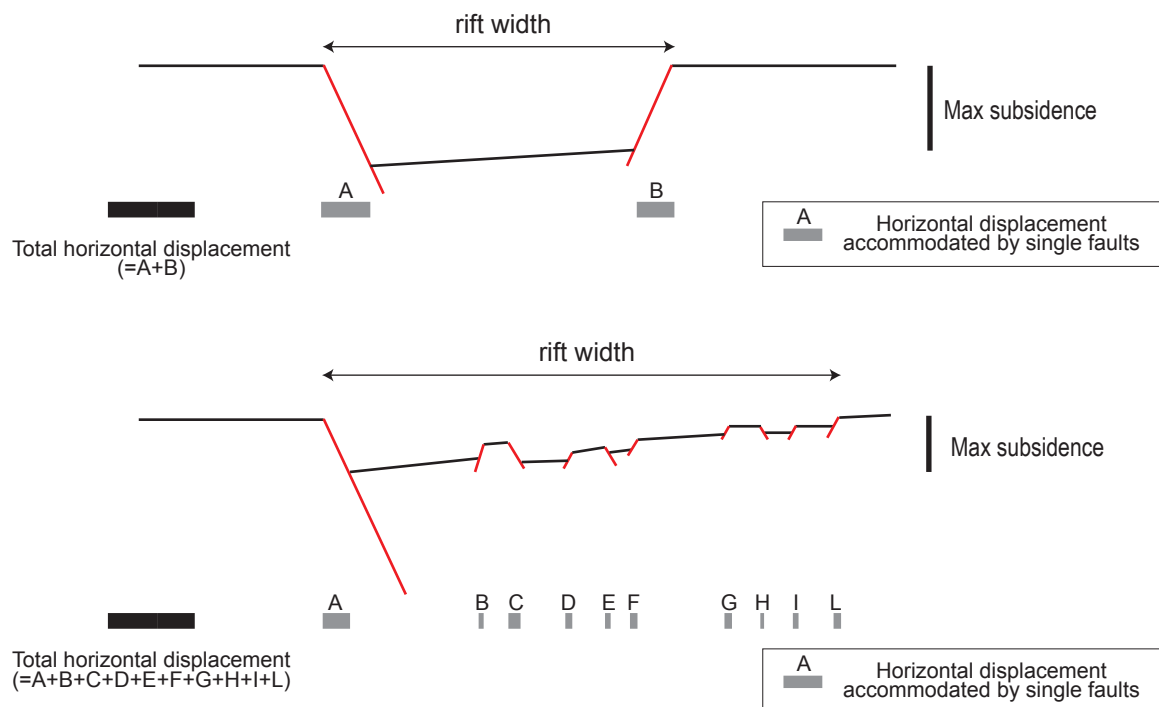

**Figure DR4.** Graphs illustrating the relations between the width of the deformation zone and the rift subsidence (top) and the number of faults (centre) in all the different experiments. Bottom: cartoons illustrating the relations between the vertical and horizontal component of displacement accommodated by the extensional structures. In narrow rifts, a few major boundary faults take up horizontal displacement; these faults can accommodate large vertical throws and then promote large subsidence. In wider rifts zones, the imposed horizontal displacement is instead taken up by numerous minor faults, which can only accommodate a limited vertical displacement and thus result in limited subsidence.
